# Supplementary material for: Pretrained transformers applied to clinical studies improve predictions of treatment efficacy and associated biomarkers
Source: Springer Nature journal article supplement (doi:10.1038/s41467-025-57181-2), 2025-03-01
Supplement: MOESM1 [file 41467_2025_57181_MOESM1_ESM.pdf]

**Pretrained transformers applied to clinical studies improve predictions of treatment efficacy and associated biomarkers**

Arango-Argoty G, Kipkogei E, Stewart R, Sun GJ, Patra A, Kagiampakis I, Jacob E

**Supplementary Information**

## Supplementary Methods

### *Benchmarking against other neural network architectures*

We evaluated the following neural-network approaches for survival prediction. We used default parameters for most of the architectures, except for Neural MTLR where the learning rate was set to 0.0001 because of exploding gradients, and for Transformer survival model where we selected the best model based on the plateau of the test loss:

- **Transformer Survival<sup>1</sup>**: Hu et al. proposed the use of the transformer architecture for survival analysis to estimate the patient's survival distribution. Input features are embedded using a feed forward network passed to a set of transformer encoder layers with a feed forward neural network as output to estimate the patient survival probabilities across a predefined time intervals. Parameters: default, 4 layers, 4 heads, 128 dim, 0.0001 learning rate.
- **Cox-nnet<sup>2</sup>**: Is a relatively simple neural network architecture composed of an input layer, one hidden layer of 143 neurons and an output layer of 1 node (a cox regression) with a tanh activation function. This model uses the partial log-likelihood as the cost function for optimizing the model's parameters. Parameters: default plus L2 regularization of 0.01
- **DeepSurv<sup>3</sup>**: is a flexible feed-forward neural network trained to estimate the log-risk function in the Cox model. The model is trained using the averaged negative log partial likelihood as the loss function. Parameters: default plus one layer with 128 neurons.
- **Neural MTLR<sup>4</sup>**: Is a neural Multi-Task Logistic Regression model that estimates the probability that an event occurs on a set of predefined time intervals. Parameters: default plus one layer with 128 neurons.
- **NNET-Survival<sup>5</sup>**: is a discrete-time survival model designed to predict the probabilities of failure (event) on a given time interval. The core of this model consists of a convolutional layer followed by a max pooling and a fully connected networks where the output layer dimension represents the time intervals, and the output scores the conditional log odds of surviving each time interval. The log odds is converted to conditional probabilities using a sigmoid activation function. Parameters: default parameters.

### *Data preprocessing*

The Clinical Transformer was trained on a variety of datasets including different data modalities such as molecular (mutations, RNA seq), clinical, and demographic features. We performed different preprocessing steps depending on the data type as follows:

- **Mutational data**: We only considered missense and frameshift variants aggregated at the gene level by counting the number of mutations per gene.
- **Transcriptomics bulk RNA seq data**: We used gene expression data from TCGA to profile the tumor microenvironment in a pan cancer setting and specialized to melanoma samples. Training data (TCGA) as well as validation data (melanoma studies) were processed by extracting the 29 RNA signatures described in the Bagaev et al. study. In detail, all samples were  $\log_2(\text{TPM}+0.01)$  scaled and single sample gene set enrichment analysis (ssGSEA) was performed using R GSVA implementation. Thus, each patient was described by the 29 TME-related signatures.
- **Clinical and demographics data**: We did not perform any pre-processing to this data.

- **Data normalization:** Input data to the Clinical Transformer is scaled to the  $[0, 1]$  interval using the MinMaxScaler technique. All categorical variables were ordinally encoded.

All other modalities that did not need transformation (e.g., Chowell et al. dataset) were used exactly as they were provided by the publication where the data was downloaded.

### **Supplementary Note 1. Clinical Transformer training on the Chowell et al. dataset for comparison with Chowell's model.**

To evaluate the Clinical Transformer' performance in the Chowell et al.<sup>6</sup> dataset, we used the same training/testing splits provided in their study. We pretrained a model using all the data in the training split for 20,000 epochs and stored all 20,000 model weights. We fine-tuned a Clinical Transformer specialized for predicting patient overall survival using a training split in which 90% of the training data was used to train the model and 10% was used for validation. To identify the best pretrained model for this task, we selected several pretrained snapshot models at 100, 500, 1000, 5000, 15,000, and 20,000 pretraining epochs. For each pretrained model we then fine-tuned a survival model. We selected the 20,000 pretrained model snapshot for transfer learning because it provided the best performance in the validation set. The best epoch was selected based on the average concordance index (C-index) across the 10 runs in the validation set. Once the best pretrained weights (20,000) and epoch (195) were defined from the validation split, we trained a new model using 100% of the training split for 195 epochs. We evaluated this model in the 20% test set and compared it against tumor mutation burden (TMB) and the random forest model from Chowell et al. study.

### **Supplementary Note 2. Evaluation of Clinical Transformer trained using the Chowell et al. dataset in the training/testing split framework and in the MYSTIC trial as independent dataset.**

In this experiment, we merged the training and testing data from Chowell et al. into one single dataset and evaluated the performance of the Clinical Transformer against other survival techniques with and without pretraining, repeating the process 10 times. First, the data were divided into 80% for training and 20% for testing samples (10 times). Second, we pretrained the Clinical Transformer model using the entire dataset during 30,000 epochs. Third, we trained 10 Clinical Transformer models using the Chowell et al. training splits. Each fold was trained independently with and without the 30,000-pretraining snapshot. We empirically selected the best survival model epoch based on the mean C-index across 5% of the testing data, which was contrasted against the complete test set over the 10 splits (511 and 300 for the without and with pretraining models, respectively; MSI\_SCORE and FCNA were unavailable in the MYSTIC trial [NCT02453282]). As the Clinical Transformer can handle missing features at inference, these two variables were not used in predicting patient survival scores.

The results showed that the model without pretraining achieved a C-index of 0.714, as compared with the model with pretraining, which had a C-index of 0.720; the random forest model, with a C-index of 0.714; Cox proportional hazards (PH), with a C-index of 0.709; and TMB, with a C-index of 0.55 (Supplementary Table 1).

We evaluated the performance of the Clinical Transformer using the Chowell et al. MYSTIC trial data by matching the features available on the trial. In total we identified a cohort of 150 patients (74 treated with PD-L1 and 76 with PD-L1 + CTLA-4) with a complete feature set (from 325 patients with available tissue TMB, only 150 had germline human leukocyte antigen [HLA] typing [HLA evolutionary divergence, HED]), except for MSI\_SCORE and FCNA, which were unavailable in the clinical trial data. The 10 Clinical Transformer models trained on the Chowell

et al. data were evaluated on MYSTIC data. The model with pretraining achieved a C-index of 0.643, whereas the Clinical Transformer without pretraining obtained a C-index of 0.616 and TMB on MYSTIC data showed a C-index of 0.608. Random forest and the Cox PH model were not evaluated on the MYSTIC data, as those models cannot handle missing data. For patient stratification (Supplementary Figure 2), we extracted the median cutoffs from the training splits for the different methods (the direct and gradual learning as well as for the TMB score; (Supplementary Table 1, Supplementary Figure 2).

### **Supplementary Note 3. Samstein et al. dataset training/testing framework.**

We pretrained the Clinical Transformer using all patient population from GENIE v11 using all available clinical and molecular data during 20,000 iterations.

We trained a Clinical Transformer model to predict patient overall survival in the Samstein et al. dataset, using 10 splits of 80% training and 20% testing. The baseline model corresponds to the model trained to predict survival without GENIE pretraining, and the E20000 model refers to the Clinical Transformer model trained on the Samstein et al. data, using the GENIE pretrained weights at the 20,000 snapshot.

Best epoch was empirically selected by looking at a small 5% proportion of the testing set in which 20% of the features were randomly shuffled to increase variability. We also evaluated the model's performance in the full testing set, using the average performance C-index across the 10 test sets. We did not find any significant difference in the testing at 5% and 100% evaluations. Therefore, we selected the models at the 25-training epoch (no difference in performance between epoch 23 to 30) for the pretrained model and the epoch 85 for the baseline model. Note that the same best epoch range (<25) was observed in an independent run using the Memorial Sloan Kettering Multimodal Integration of Dataset (80/20% data splits) with the GENIE pretrained at the 20,000 snapshot. Independently, these two runs confirmed that the best model using pretraining lay approximately at epoch 25.

### **Supplementary Note 4. Thorsson et al. dataset features.**

The features reported by Thorsson et al.<sup>7</sup> characterized the tumor microenvironment (TME) using major immunogenomics methods for the assessment of total lymphocytic infiltrate (from genomic and hematoxylin-eosin image data), immune cell fractions from deconvolution analysis of mRNA sequencing data, immune gene expression signatures, neoantigen prediction, TCR and BCR repertoire inference, viral RNA expression, and somatic DNA alterations from TCGA.

### **Supplementary Note 5. Transfer learning: pretraining on GENIE and fine-tuning on smaller datasets.**

We implemented pretraining and transfer learning using GENIE data and fine-tuned on small cohorts of patients to predict patient survival. To demonstrate the advantage of this approach, we implemented the following three stages: (1) pretraining, in which a model is trained on the GENIE v.11 dataset ( $N = 134,626$ ), including 2,290 variables via standard masked self-supervised learning; (2) transfer learning, in which the GENIE model's weights are transferred to

a survival model with the same architecture but outputs a survival score; and (3) prediction of patient survival by fine-tuning the model on a small cohort of patients with a clear treatment line and survival endpoint. This third stage is benchmarked independently across four IO datasets: Samstein et al. pan-cancer ( $N = 1610$ ),<sup>8</sup> lung cancer from MSK Multi-modal Integration of Data (MIND) ( $N = 246$ ), the MYSTIC trial ( $N = 325$ ), and the Dana Farber Cancer Institute melanoma dataset ( $N = 110$ ) (Table 1). We evaluated direct and transfer learning models using the C-index and the number of iterations to reach peak performance over 10 training (80%) and testing (20%) splits (Supplementary Note 3).

#### **Supplementary Note 6. Transfer learning: pretraining from the Chowell et al. dataset and transfer to MYSTIC.**

We evaluated the added value of the transfer learning using the Chowell et al. dataset over the MYSTIC dataset. First, we pretrained a model using all the data from the Chowell et al. dataset (train + test splits) and used the model snapshot at epoch 30,000. The pretrained model weights were transferred to a specialized model to predict patient overall survival using the MYSTIC data. For survival analysis, the MYSTIC data were divided into 10 training and testing splits, and 10 models were trained with and without pretraining. We selected the best model based on the averaged C-index of the 10 models in the test set. A random survival forest, a Cox PH model, and TMB were used for comparison (Table 2).

#### **Supplementary Note 7. Foundation model: pretraining with GENIE and fine-tuning on the MSK-MeTropism dataset.**

We trained the Clinical Transformer on GENIE v15 data (excluding samples from MSK-MeTropism; 167,421 samples) for 10,000 iterations, and fine-tuned it on MSK-MeTropism prostate cancer data (1,762 samples from metastatic disease: 939 primary tumor samples and 823 metastatic tumor samples). We did not use our pre-trained GENIE v11 foundation model, as it already included sample type as an input feature and MSK-MeTropism samples, precluding its use for this task. Training included all available molecular features aggregated at the gene level (missense and frameshift variants only, with copy number variants pre-extracted at the gene level) alongside patient age, sex, race, cancer type, sample type, cancer type detailed, sample type detailed, and sequencing center.

The Clinical Transformer with fine-tuning outperformed the random forest model on the average test set AUROC across all 10 times repeated train/test split data fractions (Supplementary Table 3). The advantage was most pronounced with small training sizes; using only 5% of data for training, the Clinical Transformer achieved an AUC of 0.761 ( $\pm 0.011$ ) compared to 0.722 ( $\pm 0.017$ ) for random forest.

#### **Supplementary Note 8. Transfer learning with GENIE to the Samstein et al. dataset using only mutational data.**

We trained a Clinical Transformer model using only the mutational data from the Samstein et al. dataset (469 gene mutations) without any other clinical or aggregated feature (e.g., race, age, TMB). This experiment was conducted to test the ability of the Clinical Transformer to identify

molecular features associated with patient survival while being unbiased to any aggregated feature such as TMB. We used the pretrained GENIE dataset at 20,000 epochs and trained the survival model for 10 repetitions, using splits of 80% training and 20% testing. The best model epoch was defined at 25 and was empirically selected as the average of the 10 model's performance in the test set. We evaluated the performance of the model using C-index. Note that the model trained only with mutational data (20,000 epochs, E020000) underperformed compared with the model that included clinical data (20,000 epochs, E020000B) but still outperformed the baseline without pretraining. For model interpretability, we computed all pairs cosine-similarities over the 10 test sets for consistency and extracted 50 functional groups by using a hierarchical clustering algorithm (Supplementary Figure 5). These functional groups represent the molecular associations within the data and their impact on survival.

#### **Supplementary Note 9. Variant/invariant populations in the Chowell et al. dataset.**

Probabilistic impact on patient survival is measured by the standard deviation of the distribution of all survival scores when one or two variables are perturbed. If a patient has a high standard deviation, it reflects changes in survival scores, whereas patients with standard deviation close to 0 indicate that the patient is not sensitive to perturbations in the given variable(s).

#### **Supplementary Note 10. Positional encoding impact on model predictions.**

To confirm that the Clinical Transformer, which lacks position encoding, is not sensitive to feature order, we performed the following experiment. We trained a modified version of a Clinical Transformer model on data from Chowell et al. that lacks feature order shuffling (i.e. samples features in a constant order). During model inference, we shuffled the order of features and generated 10 shuffled replicates for each sample. We then computed the standard deviation of model predictions for each sample against their 10 replicates. The standard deviations showed an exceedingly low variance (below  $1e-6$ ; Supplementary Figure 10). This result provides clear empirical evidence that feature order does not affect the predictive consistency of the Clinical Transformer.

#### **Supplementary Note 11. Choosing the number of clusters (functional groups).**

For the identification of the number of functional groups from the cosine similarity scores, we used a conventional silhouette score-based methodology (arbitrary, other method could have been chosen). For instance, in the Chowell et al., dataset, we used the k-means clustering algorithm across a predefined range of potential cluster numbers (2 to 10). The silhouette score for each predefined number of clusters was computed to quantitatively assess the clustering quality. This metric evaluates the degree of similarity of an instance to its assigned cluster in relation to other clusters. The selection of the optimal number of clusters was defined by the highest silhouette score (in this case  $k=4$ ). This approach ensures that the chosen cluster solution maximizes intra-cluster similarity while maintaining clear delineation between different clusters.

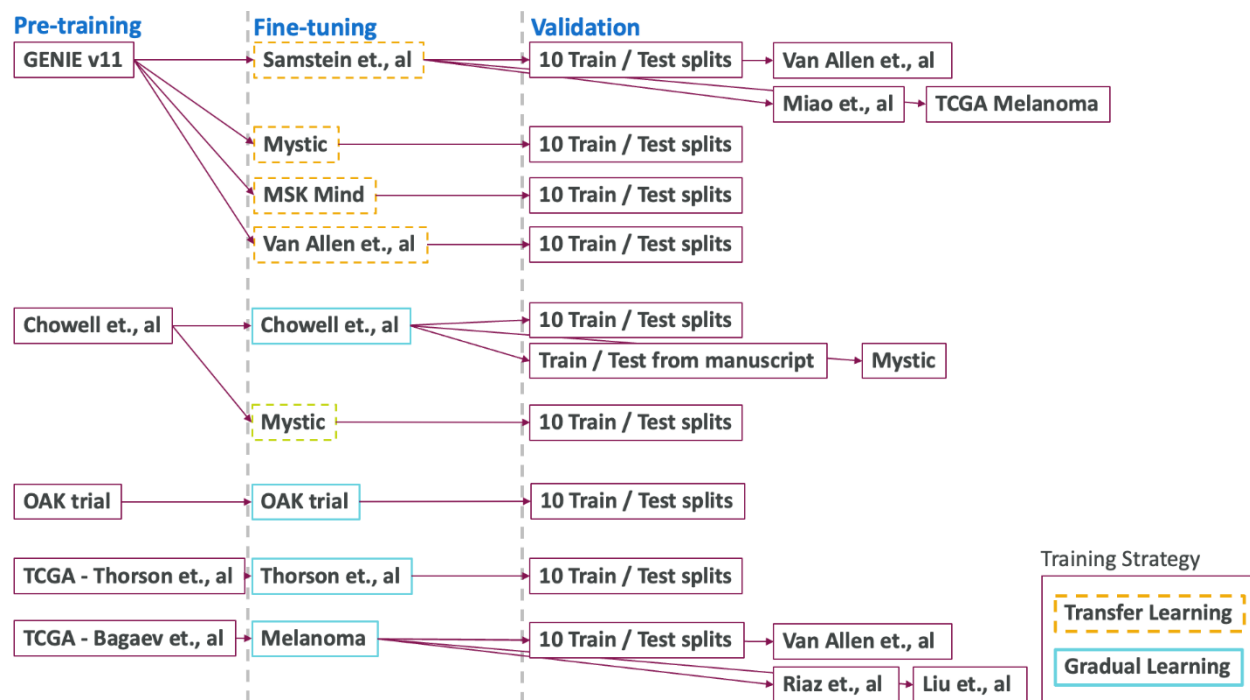

**Supplementary Figure 1.** Experimental data flow for Clinical Transformer.



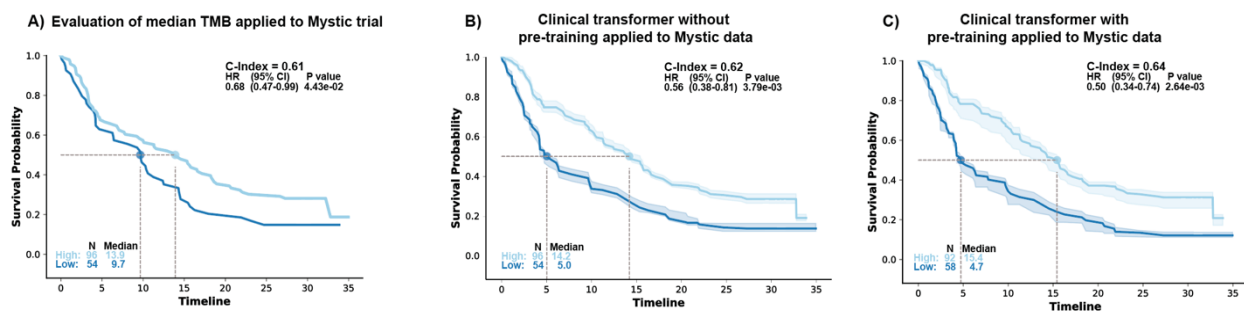

**Supplementary Figure 2.** Patient stratification using **a**, TMB; **b**, direct; and **c**, gradual learning in the test sets (10 repetitions). Patient population was stratified using the median cutoff from the training splits. Solid line indicates the averaged KM curve across the 10 training repetitions and the areas represent the variability across the 10 testing splits. P-values for hazard ratios were computed with a Wald test. Source data are provided in the SupplementarySourceData file.

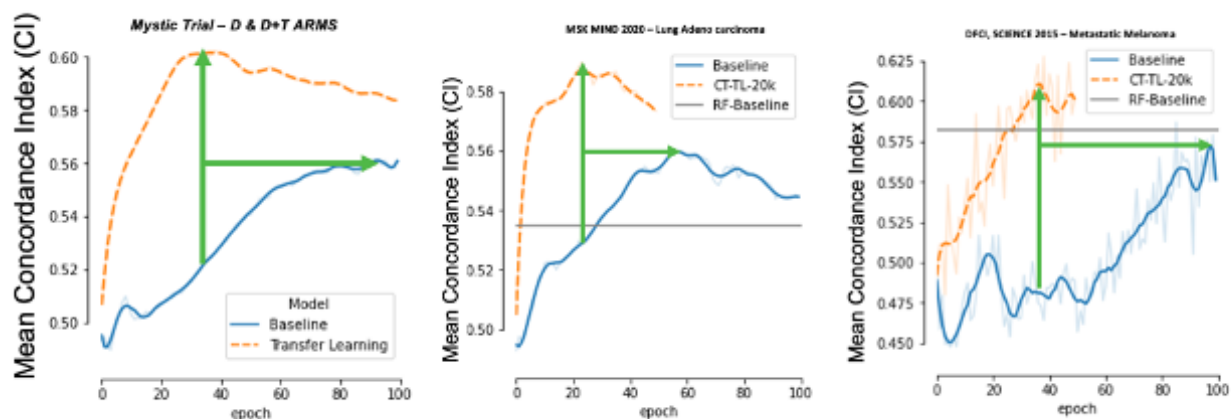

**Supplementary Figure 3.** Positive effect of transfer learning from pretrained model using GENIE to other small datasets. Models pretrained with GENIE dataset achieved a peak performance in a smaller number of epochs compared with baseline Clinical Transformer trained models. Source data are provided in the SupplementarySourceData file.

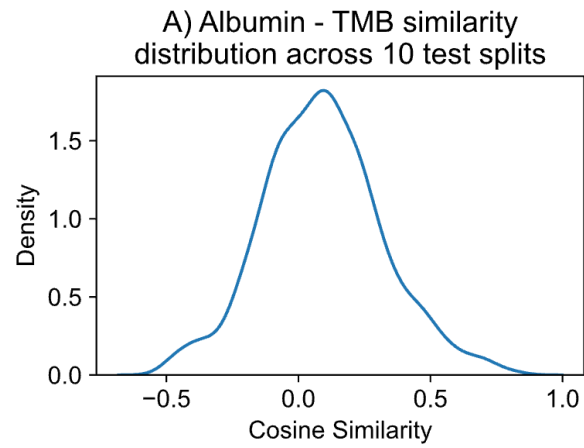

**Supplementary Figure 4.** Albumin–TMB cosine similarity score across the test populations in Chowell et al.<sup>6</sup> dataset. Cosine similarity distribution.

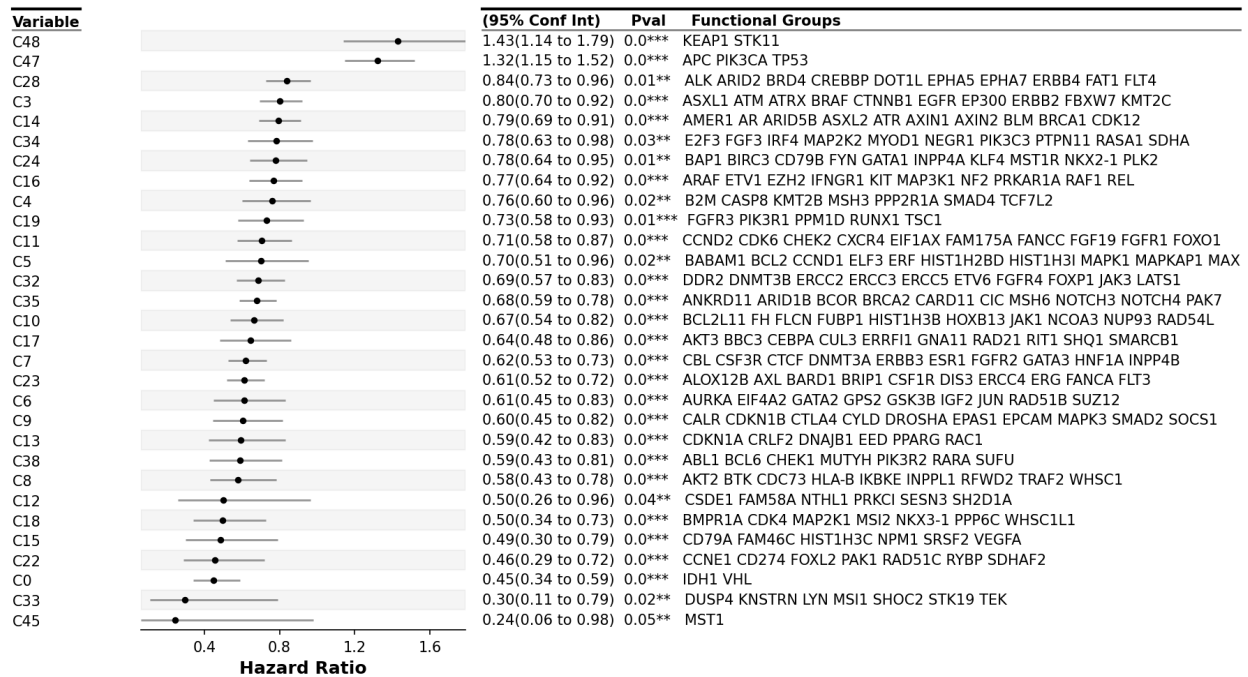

**Supplementary Figure 5.** CoxPH HR (error bars: 95% confidence interval) of significant ( $P < 0.05$ ) functional groups, as computed over Samstein et al.<sup>8</sup> dataset, comparing patients with at least 1 mutated gene in the given functional group vs. those with no mutated genes in the given functional group. P-values for hazard ratios were computed with a Wald test. Conf Int, confidence interval; Pval, p-value. Source data are provided in the SupplementarySourceData file.

A) Cox PH model using 10 randomly generated functional groups

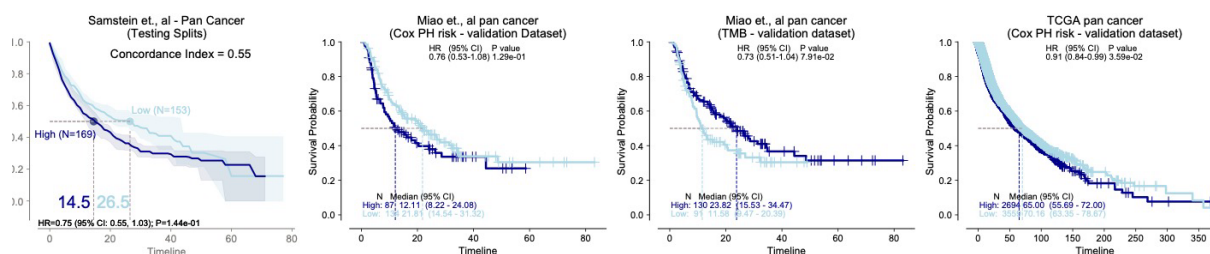

B) Cox PH model using 10 randomly selected gene sets from the 50 hallmark gene sets

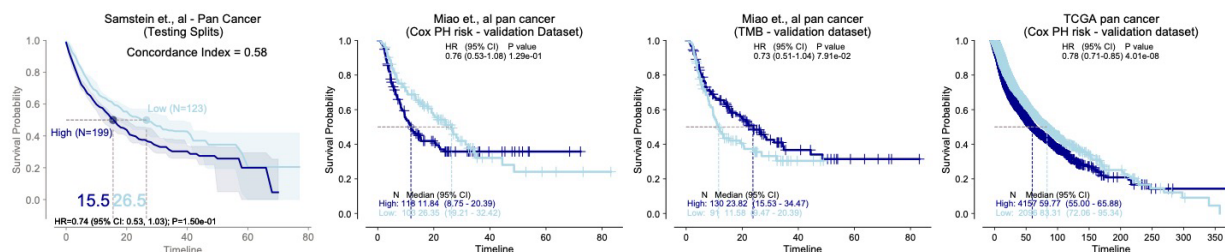

**Supplementary Figure 6.** Integration of functional groups to predict patient survival with immuno-oncology (IO) treatment in the testing splits (discovery dataset) as well as on Miao et al.<sup>9</sup> pan-cancer IO-treated patients and treatment-naïve pan-cancer datasets in The Cancer Genome Atlas (TCGA). **a**, Evaluation of randomly generated functional groups of the same size and number of genes as the top 10 groups. **b**, Evaluation of 10 randomly selected hallmark gene sets from the complete 50 hallmark sets and subsetting it to the MSK panel genes. P-values for hazard ratios were computed with a Wald test. Source data are provided in the SupplementarySourceData file.

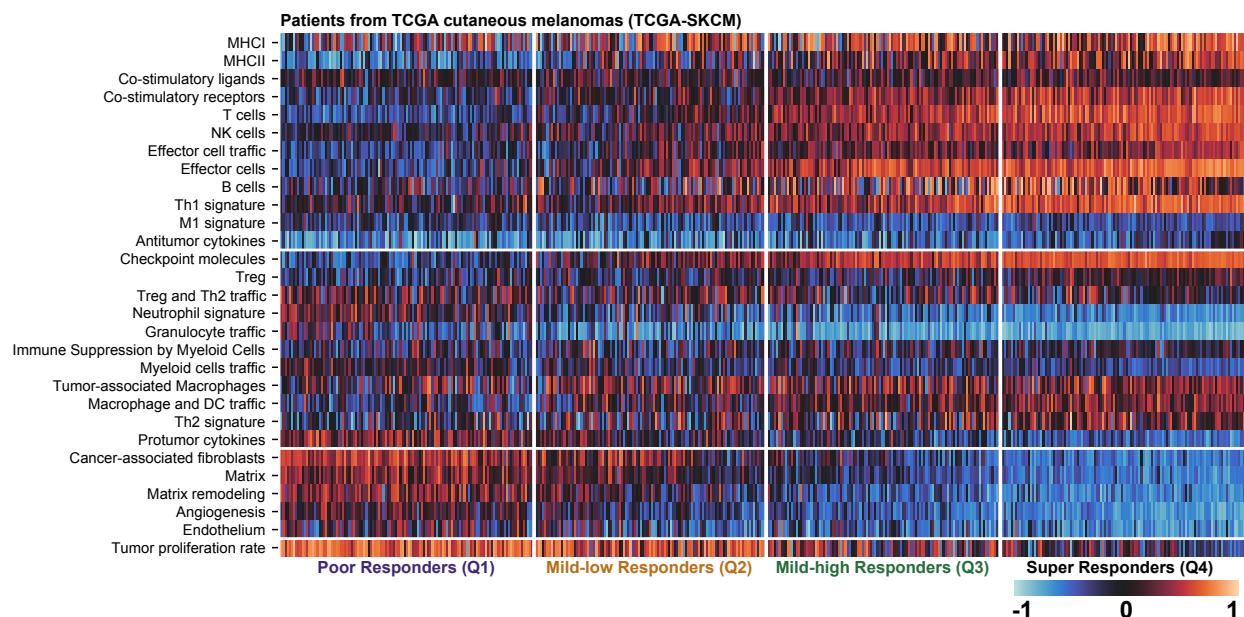

**Supplementary Figure 7.** Distribution of gene expression signatures across the four survival groups. Groups Q3 and Q4, with prolonged survival, demonstrated an increase in expression of signatures associated with productive antitumor immunity, such as major histocompatibility complex, T-cells, and T helper type 1 cell signaling. In contrast, groups Q1 and Q2, with reduced survival, demonstrate reduced expression of these signatures commensurate with an increase in signatures of neutrophils, protumor inflammatory signals, cancer-associated fibroblasts, and matrix remodeling. Source data are provided in the SupplementarySourceData file.

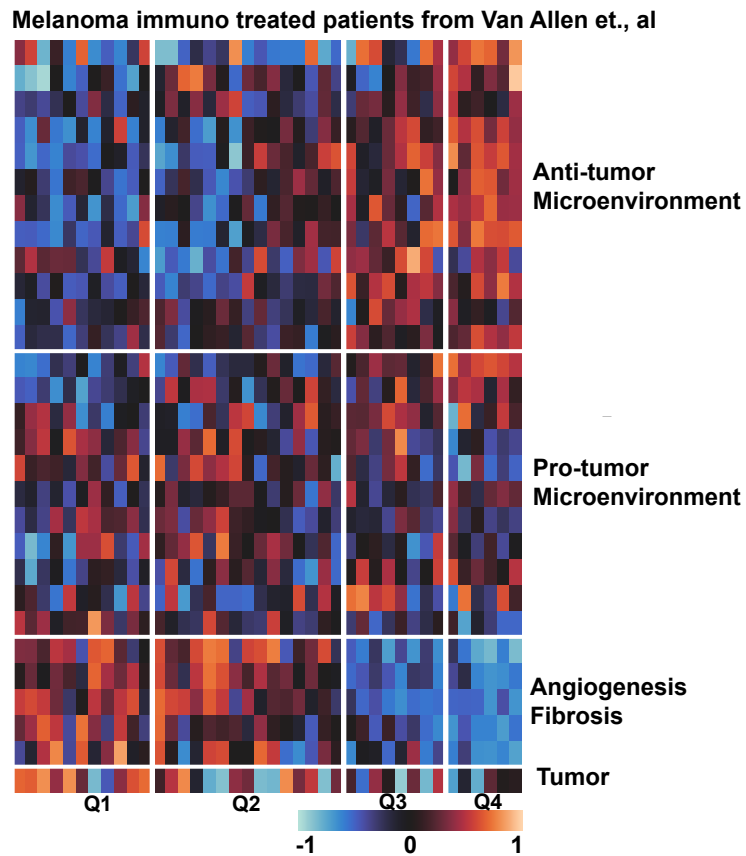

**Supplementary Figure 8.** Heat map of the tumor microenvironment signatures in the Van Allen et al. dataset.<sup>10</sup> Source data are provided in the SupplementarySourceData file.

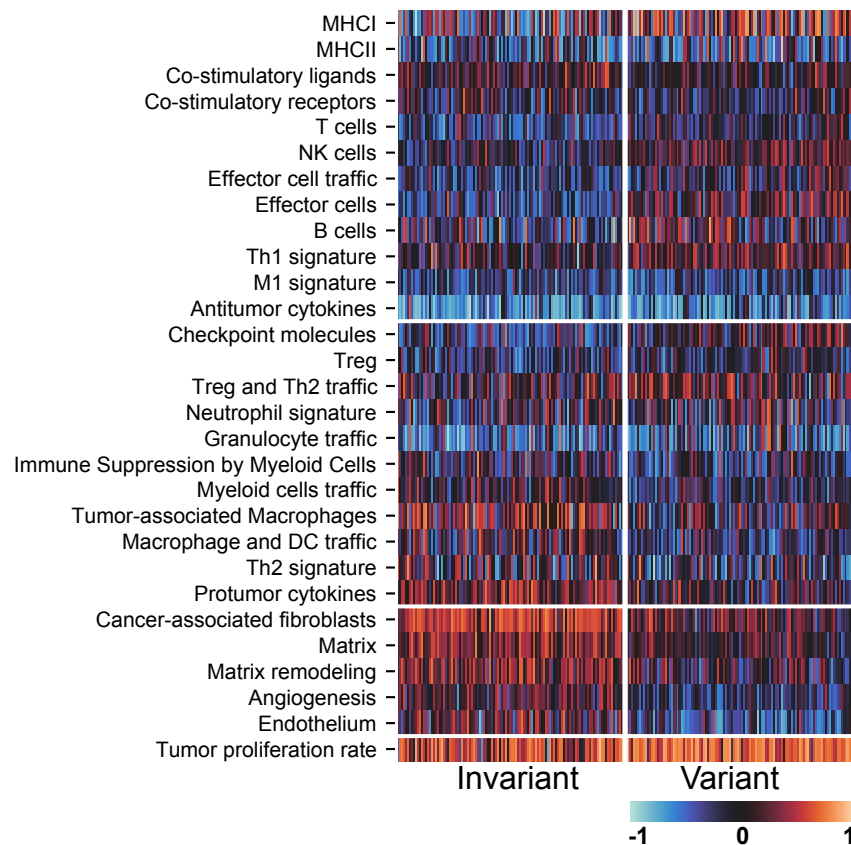

**Supplementary Figure 9.** Heat map of tumor microenvironment enrichment for the invariant (left column) and variant (right column) populations within TCGA-SKCM. Source data are provided in the SupplementarySourceData file.



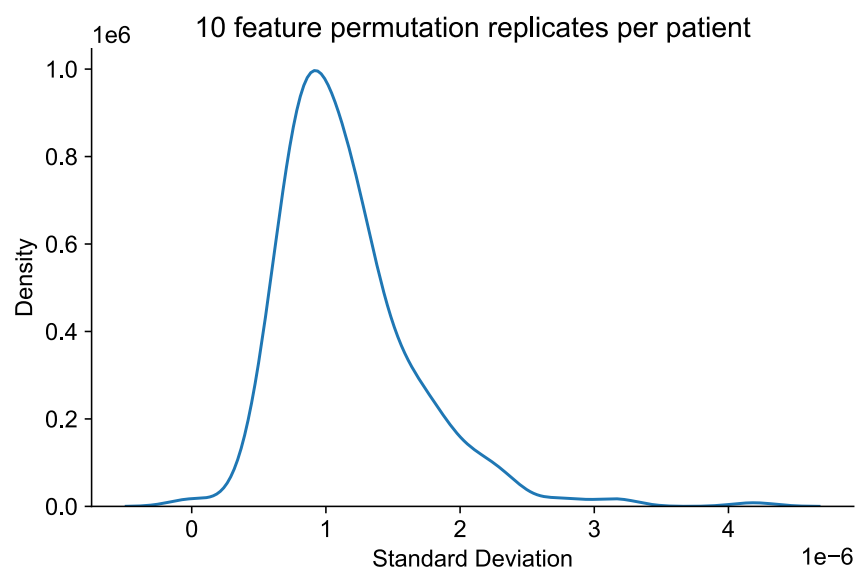

**Supplementary Figure 10.** Standard deviation of survival score across 10 feature-permuted replicates for each patient. SuSource data are provided in the SupplementarySourceData file.

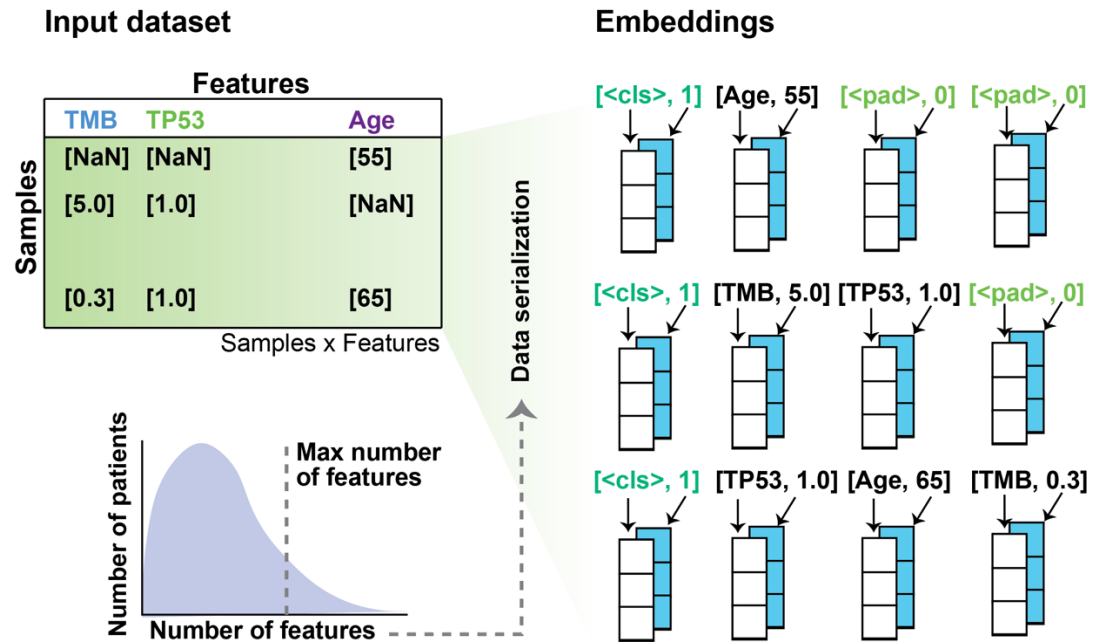

**Supplementary Figure 11.** Input data processing flow for Clinical Transformer.

**Supplementary Table 1.** Performance of the Clinical Transformer model trained on the Chowell et al. dataset and evaluated on the MYSTIC trial. Results reported as mean c-index  $\pm$  standard deviation across 10 train/test splits. Boldface indicates modeling framework with best performance.

| Modeling framework   |                        | Chowell et al. 2021                | MYSTIC (validation)                 |
|----------------------|------------------------|------------------------------------|-------------------------------------|
| Clinical Transformer | Direct learning        | $0.714 \pm 0.01$                   | $0.616 \pm 0.004$                   |
|                      | Gradual learning       | <b><math>0.720 \pm 0.01</math></b> | <b><math>0.643 \pm 0.004</math></b> |
| Linear modeling      | Cox PH regression      | $0.709 \pm 0.01$                   | —                                   |
| Nonlinear modeling   | Random survival forest | $0.714 \pm 0.01$                   | —                                   |
| Biomarkers           | TMB                    | $0.550 \pm 0.02$                   | $0.608 \pm 0.000$                   |

**Supplementary Table 2.** Impact of GENIE transfer learning. The GENIE pretrained model was used to fine-tune survival time and event across four datasets. **Top:** C-index of best model (mean  $\pm$  standard deviation across 10 train/test splits) for both direct and gradual learning. **Bottom:** Number of epochs (or iterations) the model needs to achieve peak performance. Column headers in bold.

| <b>Learning type</b>     | <b>Samstein et al.<sup>8</sup></b> | <b>DFCI melanoma</b> | <b>MYSTIC trial</b> | <b>MSK MIND</b>  |
|--------------------------|------------------------------------|----------------------|---------------------|------------------|
| <b>Concordance index</b> |                                    |                      |                     |                  |
| Direct learning          | 0.627 $\pm$ 0.02                   | 0.587 $\pm$ 0.10     | 0.561 $\pm$ 0.05    | 0.560 $\pm$ 0.02 |
| Transfer learning        | 0.649 $\pm$ 0.02                   | 0.628 $\pm$ 0.07     | 0.602 $\pm$ 0.05    | 0.590 $\pm$ 0.03 |
| <b>Training epochs</b>   |                                    |                      |                     |                  |
| Direct learning          | 86                                 | 85                   | 95                  | 57               |
| Transfer learning        | 27                                 | 38                   | 38                  | 23               |
| Average reduction (%)    |                                    |                      |                     | 39.1130271       |

**Supplementary Table 3.** Model performance for the metastatic or primary prediction task at different training sizes. AUC mean scores and standard deviations over 10 training / testing splits. Boldface indicates model with best performance. TL1, Transfer learning from GENIE using the pre-trained 100 epoch snapshot; TL2, Transfer learning from GENIE using the pre-trained 10,000 epoch snapshot; RF, Random forest model.

|                 | AUC @ Training data (%)  |                          |                          |                          |                          |                          |                          |                          |                          |                          |                          |
|-----------------|--------------------------|--------------------------|--------------------------|--------------------------|--------------------------|--------------------------|--------------------------|--------------------------|--------------------------|--------------------------|--------------------------|
| Model           | 1                        | 5                        | 10                       | 20                       | 30                       | 40                       | 50                       | 60                       | 70                       | 80                       | 90                       |
| TL <sub>1</sub> | <b>0.690</b><br>(±0.045) | <b>0.761</b><br>(±0.011) | <b>0.770</b><br>(±0.008) | <b>0.776</b><br>(±0.004) | <b>0.781</b><br>(±0.006) | <b>0.784</b><br>(±0.010) | <b>0.786</b><br>(±0.017) | <b>0.788</b><br>(±0.012) | <b>0.788</b><br>(±0.022) | <b>0.790</b><br>(±0.024) | <b>0.799</b><br>(±0.026) |
| TL <sub>2</sub> | 0.673<br>(±0.068)        | 0.756<br>(±0.010)        | 0.766<br>(±0.010)        | 0.771<br>(±0.008)        | 0.774<br>(±0.009)        | 0.776<br>(±0.012)        | 0.779<br>(±0.019)        | 0.782<br>(±0.016)        | 0.782<br>(±0.024)        | 0.784<br>(±0.022)        | 0.792<br>(±0.025)        |
| RF              | 0.679<br>(±0.057)        | 0.722<br>(±0.037)        | 0.738<br>(±0.017)        | 0.757<br>(±0.013)        | 0.767<br>(±0.011)        | 0.768<br>(±0.010)        | 0.773<br>(±0.010)        | 0.783<br>(±0.016)        | 0.784<br>(±0.017)        | 0.784<br>(±0.019)        | 0.784<br>(±0.025)        |

**Supplementary Table 4.** Pairwise cosine similarity between all feature embeddings across 10 test splits in Chowell et al.<sup>6</sup> dataset. Column headers in bold.

| <b>source</b>                 | <b>target</b>     | <b>cosine</b> | <b>cluster</b> |
|-------------------------------|-------------------|---------------|----------------|
| Albumin                       | TMB               | 0.090804      | -1             |
| Albumin                       | HLA_LOH           | 0.102075      | -1             |
| MSI_SCORE                     | Stage at IO start | 0.12652       | -1             |
| Cancer_Type                   | MSI_SCORE         | 0.130802      | -1             |
| Drug_class                    | MSI_SCORE         | 0.132756      | -1             |
| Cancer_Type                   | TMB               | 0.14081       | -1             |
| Chemo_before_IO (1:Yes; 0:No) | HLA_LOH           | 0.142047      | -1             |
| Drug_class                    | TMB               | 0.152745      | -1             |
| Chemo_before_IO (1:Yes; 0:No) | TMB               | 0.15311       | -1             |
| Stage at IO start             | TMB               | 0.153569      | -1             |
| Age                           | HLA_LOH           | 0.157596      | -1             |
| Platelets                     | TMB               | 0.163091      | -1             |
| Cancer_Type                   | HLA_LOH           | 0.167021      | -1             |
| Drug_class                    | HLA_LOH           | 0.16719       | -1             |
| HLA_LOH                       | Stage at IO start | 0.16879       | -1             |
| Cancer_Type                   | HED               | 0.173664      | -1             |
| Drug_class                    | HED               | 0.179617      | -1             |
| HED                           | Stage at IO start | 0.179697      | -1             |
| HLA_LOH                       | Platelets         | 0.180411      | -1             |
| Age                           | TMB               | 0.180579      | -1             |
| HGB                           | Stage at IO start | 0.193215      | -1             |
| Albumin                       | Drug_class        | 0.193443      | -1             |
| Albumin                       | Stage at IO start | 0.200334      | -1             |
| Drug_class                    | HGB               | 0.201872      | -1             |
| HGB                           | HLA_LOH           | 0.203599      | -1             |
| Cancer_Type                   | HGB               | 0.205256      | -1             |
| HGB                           | TMB               | 0.209394      | -1             |
| Cancer_Type                   | NLR               | 0.210308      | -1             |
| Albumin                       | Cancer_Type       | 0.213965      | -1             |

| <b>source</b>                 | <b>target</b>          | <b>cosine</b> | <b>cluster</b> |
|-------------------------------|------------------------|---------------|----------------|
| NLR                           | Stage at IO start      | 0.216547      | -1             |
| Drug_class                    | NLR                    | 0.217594      | -1             |
| MSI_SCORE                     | Platelets              | 0.22695       | -1             |
| BMI                           | HLA_LOH                | 0.22727       | -1             |
| Chemo_before_IO (1:Yes; 0:No) | MSI_SCORE              | 0.232161      | -1             |
| BMI                           | Stage at IO start      | 0.23337       | -1             |
| BMI                           | Cancer_Type            | 0.235731      | -1             |
| HLA_LOH                       | Sex (1:Male; 0:Female) | 0.239134      | -1             |
| FCNA                          | HLA_LOH                | 0.245705      | -1             |
| HED                           | Platelets              | 0.245854      | 0              |
| BMI                           | Drug_class             | 0.246851      | -1             |
| Albumin                       | MSI_SCORE              | 0.252161      | -1             |
| FCNA                          | TMB                    | 0.258304      | -1             |
| BMI                           | TMB                    | 0.259914      | -1             |
| Age                           | MSI_SCORE              | 0.269567      | -1             |
| FCNA                          | MSI_SCORE              | 0.277269      | -1             |
| Platelets                     | Stage at IO start      | 0.286154      | -1             |
| Age                           | Stage at IO start      | 0.291318      | -1             |
| Cancer_Type                   | Platelets              | 0.293372      | -1             |
| Drug_class                    | Platelets              | 0.294873      | -1             |
| Chemo_before_IO (1:Yes; 0:No) | HED                    | 0.298438      | -1             |
| Age                           | Drug_class             | 0.302489      | -1             |
| Age                           | Cancer_Type            | 0.303002      | -1             |
| Sex (1:Male; 0:Female)        | TMB                    | 0.307323      | -1             |
| MSI_SCORE                     | Sex (1:Male; 0:Female) | 0.311496      | -1             |
| HGB                           | Sex (1:Male; 0:Female) | 0.312721      | -1             |
| Chemo_before_IO (1:Yes; 0:No) | NLR                    | 0.322467      | -1             |
| HED                           | HLA_LOH                | 0.322497      | -1             |
| HGB                           | MSI_SCORE              | 0.325534      | -1             |
| BMI                           | MSI_SCORE              | 0.328931      | -1             |

| <b>source</b>                 | <b>target</b>                 | <b>cosine</b> | <b>cluster</b> |
|-------------------------------|-------------------------------|---------------|----------------|
| Chemo_before_IO (1:Yes; 0:No) | Platelets                     | 0.347991      | -1             |
| Chemo_before_IO (1:Yes; 0:No) | HGB                           | 0.353559      | -1             |
| NLR                           | Platelets                     | 0.355904      | 0              |
| FCNA                          | HED                           | 0.357096      | -1             |
| Age                           | FCNA                          | 0.360321      | -1             |
| Age                           | Platelets                     | 0.367669      | 0              |
| Platelets                     | Sex (1:Male; 0:Female)        | 0.368122      | -1             |
| Age                           | NLR                           | 0.380484      | 0              |
| FCNA                          | NLR                           | 0.382884      | -1             |
| Albumin                       | HED                           | 0.386779      | 0              |
| HLA_LOH                       | NLR                           | 0.388365      | -1             |
| FCNA                          | HGB                           | 0.390842      | -1             |
| HED                           | MSI_SCORE                     | 0.39182       | -1             |
| Age                           | Chemo_before_IO (1:Yes; 0:No) | 0.394198      | -1             |
| HED                           | Sex (1:Male; 0:Female)        | 0.396839      | -1             |
| BMI                           | Sex (1:Male; 0:Female)        | 0.401142      | -1             |
| HED                           | NLR                           | 0.413955      | 0              |
| BMI                           | Chemo_before_IO (1:Yes; 0:No) | 0.422232      | -1             |
| NLR                           | Sex (1:Male; 0:Female)        | 0.42726       | -1             |
| BMI                           | HED                           | 0.428204      | 0              |
| Age                           | Sex (1:Male; 0:Female)        | 0.43022       | -1             |
| NLR                           | TMB                           | 0.431291      | -1             |
| HED                           | TMB                           | 0.43216       | -1             |
| Albumin                       | Chemo_before_IO (1:Yes; 0:No) | 0.444123      | -1             |
| Age                           | HED                           | 0.448813      | 0              |
| HGB                           | Platelets                     | 0.449957      | 0              |
| Albumin                       | FCNA                          | 0.45593       | -1             |
| Albumin                       | Sex (1:Male; 0:Female)        | 0.457991      | -1             |
| BMI                           | FCNA                          | 0.459169      | -1             |



| <b>source</b>                 | <b>target</b>                    | <b>cosine</b> | <b>cluster</b> |
|-------------------------------|----------------------------------|---------------|----------------|
| BMI                           | NLR                              | 0.459716      | 0              |
| Cancer_Type                   | Chemo_before_IO<br>(1:Yes; 0:No) | 0.459975      | -1             |
| Chemo_before_IO (1:Yes; 0:No) | Stage at IO start                | 0.463177      | -1             |
| Age                           | Albumin                          | 0.468315      | 0              |
| HGB                           | NLR                              | 0.46935       | 0              |
| Albumin                       | BMI                              | 0.471736      | 0              |
| Chemo_before_IO (1:Yes; 0:No) | Drug_class                       | 0.478527      | -1             |
| MSI_SCORE                     | NLR                              | 0.482745      | -1             |
| Albumin                       | NLR                              | 0.490508      | 0              |
| HED                           | HGB                              | 0.49444       | 0              |
| FCNA                          | Platelets                        | 0.512317      | -1             |
| Chemo_before_IO (1:Yes; 0:No) | FCNA                             | 0.536875      | 3              |
| Age                           | HGB                              | 0.5395        | 0              |
| Cancer_Type                   | FCNA                             | 0.541182      | -1             |
| Cancer_Type                   | Sex (1:Male; 0:Female)           | 0.547098      | -1             |
| Drug_class                    | FCNA                             | 0.550968      | -1             |
| Albumin                       | Platelets                        | 0.556542      | 0              |
| BMI                           | HGB                              | 0.558014      | 0              |
| Drug_class                    | Sex (1:Male; 0:Female)           | 0.558315      | -1             |
| Sex (1:Male; 0:Female)        | Stage at IO start                | 0.560583      | -1             |
| FCNA                          | Stage at IO start                | 0.578723      | -1             |
| Age                           | BMI                              | 0.592643      | 0              |
| MSI_SCORE                     | TMB                              | 0.59388       | 2              |
| BMI                           | Platelets                        | 0.60135       | 0              |
| Albumin                       | HGB                              | 0.606935      | 0              |
| Chemo_before_IO (1:Yes; 0:No) | Sex (1:Male; 0:Female)           | 0.622801      | 3              |
| FCNA                          | Sex (1:Male; 0:Female)           | 0.66105       | 3              |
| HLA_LOH                       | MSI_SCORE                        | 0.675359      | 2              |
| HLA_LOH                       | TMB                              | 0.696034      | 2              |
| Cancer_Type                   | Drug_class                       | 0.972104      | 1              |

| <b>source</b> | <b>target</b>     | <b>cosine</b> | <b>cluster</b> |
|---------------|-------------------|---------------|----------------|
| Cancer_Type   | Stage at IO start | 0.97506       | 1              |
| Drug_class    | Stage at IO start | 0.980401      | 1              |

**Supplementary Table 5.** Mean value of tumor microenvironment gene signatures (feature; Bagaev et al.<sup>11</sup>) computed for each of the patient subgroups that changed (mean variant) or did not change (mean invariant) upon perturbation of the T-cell gene expression signature within the Q1 and Q2 patients of the TCGA-SKCM cohort. Signatures are sorted by the max difference (delta) between variant and invariant subgroups. P-value (pval) is reported from a Bonferroni-corrected two-sided Mann-Whitney-Wilcoxon test comparing the distributions of variant and invariant patient populations. Column headers in bold.

| <b>Feature</b>                      | <b>pval</b> | <b>Mean variant</b> | <b>Mean invariant</b> | <b>delta</b> |
|-------------------------------------|-------------|---------------------|-----------------------|--------------|
| Endothelium                         | 1.521E-15   | -0.313412674        | 0.112600806           | -0.426013479 |
| Cancer-associated fibroblasts       | 4.069E-20   | 0.128167853         | 0.498169156           | -0.370001303 |
| Angiogenesis                        | 2.233E-15   | -0.200509689        | 0.120291558           | -0.320801246 |
| Matrix remodeling                   | 1.422E-10   | -0.014565958        | 0.28148602            | -0.296051978 |
| Matrix                              | 1.543E-14   | 0.057901648         | 0.331919433           | -0.274017785 |
| Protumor cytokines                  | 8.999E-11   | -0.000761741        | 0.269065383           | -0.269827124 |
| Tumor-associated Macrophages        | 2.992E-06   | -0.015938159        | 0.221935134           | -0.237873292 |
| Macrophage and DC traffic           | 5.583E-06   | -0.189935965        | 0.02157267            | -0.211508635 |
| Myeloid cells traffic               | 2.537E-07   | -0.164258572        | 0.025172696           | -0.189431268 |
| Th2 signature                       | 0.005889    | -0.160534751        | -0.010702139          | -0.149832612 |
| Immune Suppression by Myeloid Cells | 0.009670    | -0.176916701        | -0.060527783          | -0.116388918 |
| Co-stimulatory ligands              | 0.04121     | 0.013129773         | 0.093677403           | -0.08054763  |
| Antitumor cytokines                 | 0.03496     | -0.486369988        | -0.567646764          | 0.081276776  |
| Treg and Th2 traffic                | 0.02423     | 0.137531893         | 0.032257012           | 0.105274881  |
| Tumor proliferation rate            | 1.820E-06   | 0.632009267         | 0.458450045           | 0.173559222  |
| B cells                             | 0.0003497   | 0.054694791         | -0.132986461          | 0.187681252  |
| Th1 signature                       | 5.721E-07   | 0.18682555          | -0.001916572          | 0.188742123  |
| T cells                             | 1.123E-07   | -0.081965987        | -0.280401733          | 0.198435746  |
| Effector cell traffic               | 2.823E-06   | -0.044440517        | -0.247127222          | 0.202686705  |
| NK cells                            | 3.487E-12   | 0.150490246         | -0.115612173          | 0.266102419  |
| Checkpoint molecules                | 3.976E-10   | 0.053729001         | -0.233654563          | 0.287383564  |
| MHCI                                | 7.635E-06   | 0.213198128         | -0.091958146          | 0.305156274  |
| Effector cells                      | 2.997E-16   | 0.130232828         | -0.271111321          | 0.401344149  |

**Supplementary Table 6.** CoxPH hazard ratios (hr) between populations when stratifying a cohort (cohort) on the global median (computed across Allen,<sup>10</sup> Liu,<sup>12</sup> and Riaz<sup>13</sup> studies; TCGA<sup>11</sup> cohort used its own median to stratify) of a given TME gene signature (var; subset of signatures from Bagaev et al.<sup>11</sup> that were either the top four with the largest magnitude of difference between variant and invariant populations, or the bottom four with the most negative difference between variant and invariant populations; a given signature level was equal to the mean expression across all genes within that signature; see also Supplementary Table 5). hr, HR when comparing the subpopulation with its gene signature  $\leq$  the global median for that gene signature versus the subpopulation  $>$  the global median for that gene signature; hr\_lower95, the lower bound of the 95% confidence interval for the HR point estimate; hr\_upper95, the upper bound of the 95% confidence interval for the HR point estimate; N\_high, number of patients in the subpopulation with its gene signature  $>$  the global median for that gene signature; N\_Low, number of patients in the subpopulation with its gene signature  $\leq$  the global median for that gene signature. P-values for hazard ratios were computed with a Wald test. Column headers in bold.

| <b>Population</b> | <b>hr</b>  | <b>hr_lower95</b> | <b>hr_upper95</b> | <b>pval*</b> | <b>n_low</b> | <b>n_high</b> | <b>cohort</b> | <b>var</b>                    |
|-------------------|------------|-------------------|-------------------|--------------|--------------|---------------|---------------|-------------------------------|
| IO                | 0.53141082 | 0.40298061        | 0.70077183        | 7.50E-06     | 227          | 227           | tcga          | Effector cells                |
| IO                | 0.53032084 | 0.24673068        | 1.13986711        | 0.10423856   | 18           | 22            | allen         | Effector cells                |
| IO                | 0.53338112 | 0.25117768        | 1.13264609        | 0.10188323   | 18           | 24            | liu           | Effector cells                |
| IO                | 0.35451605 | 0.12128437        | 1.03625577        | 0.05810732   | 14           | 12            | riaz          | Effector cells                |
| IO                | 0.85388965 | 0.64953366        | 1.12254003        | 0.25774627   | 227          | 227           | tcga          | MHCI                          |
| IO                | 0.76860871 | 0.3553994         | 1.66224068        | 0.50367427   | 23           | 17            | allen         | MHCI                          |
| IO                | 0.65615835 | 0.31400182        | 1.37115058        | 0.26248648   | 18           | 24            | liu           | MHCI                          |
| IO                | 0.49896671 | 0.18038488        | 1.38020314        | 0.18049481   | 14           | 12            | riaz          | MHCI                          |
| IO                | 0.47893362 | 0.36333878        | 0.63130453        | 1.75E-07     | 227          | 227           | tcga          | Checkpoint molecules          |
| IO                | 0.53047203 | 0.2466364         | 1.14095314        | 0.10469667   | 20           | 20            | allen         | Checkpoint molecules          |
| IO                | 0.59325921 | 0.28020074        | 1.25608698        | 0.1724949    | 15           | 27            | liu           | Checkpoint molecules          |
| IO                | 0.95437163 | 0.35416572        | 2.57174863        | 0.92642876   | 15           | 11            | riaz          | Checkpoint molecules          |
| IO                | 0.42085914 | 0.31750045        | 0.55786507        | 1.76E-09     | 227          | 227           | tcga          | NK cells                      |
| IO                | 0.43066657 | 0.19920376        | 0.93107526        | 0.03223313   | 18           | 22            | allen         | NK cells                      |
| IO                | 0.65372763 | 0.31520277        | 1.35582506        | 0.25342494   | 17           | 25            | liu           | NK cells                      |
| IO                | 0.51602203 | 0.17717994        | 1.5028718         | 0.22511322   | 15           | 11            | riaz          | NK cells                      |
| IO                | 1.75409344 | 1.33328858        | 2.30771031        | 5.94E-05     | 227          | 227           | tcga          | Matrix remodeling             |
| IO                | 3.65286883 | 1.63044957        | 8.18390885        | 0.0016453    | 20           | 20            | allen         | Matrix remodeling             |
| IO                | 1.46327324 | 0.66782985        | 3.20615884        | 0.34150812   | 27           | 15            | liu           | Matrix remodeling             |
| IO                | 1.8890186  | 0.68270093        | 5.22687326        | 0.22061269   | 12           | 14            | riaz          | Matrix remodeling             |
| IO                | 1.94989612 | 1.4747894         | 2.57805954        | 2.78E-06     | 227          | 227           | tcga          | Angiogenesis                  |
| IO                | 1.93459675 | 0.90157541        | 4.15124961        | 0.09026745   | 21           | 19            | allen         | Angiogenesis                  |
| IO                | 1.86582008 | 0.892888          | 3.89890401        | 0.09718239   | 23           | 19            | liu           | Angiogenesis                  |
| IO                | 1.80465743 | 0.62593523        | 5.20307577        | 0.27449724   | 11           | 15            | riaz          | Angiogenesis                  |
| IO                | 1.97472489 | 1.49685053        | 2.60516219        | 1.48E-06     | 227          | 227           | tcga          | Cancer-associated fibroblasts |

| Population | hr         | hr_lower95 | hr_upper95 | pval*      | n_low | n_high | cohort | var                           |
|------------|------------|------------|------------|------------|-------|--------|--------|-------------------------------|
| IO         | 1.98349616 | 0.91511362 | 4.29920057 | 0.08270364 | 19    | 21     | allen  | Cancer-associated fibroblasts |
| IO         | 1.38564747 | 0.64212881 | 2.99008377 | 0.40588084 | 28    | 14     | liu    | Cancer-associated fibroblasts |
| IO         | 1.07221958 | 0.37089955 | 3.09963929 | 0.89755933 | 8     | 18     | riaz   | Cancer-associated fibroblasts |
| IO         | 1.87863847 | 1.4187695  | 2.48756582 | 1.07E-05   | 227   | 227    | tcga   | Endothelium                   |
| IO         | 1.01576509 | 0.46353656 | 2.22588421 | 0.96882738 | 24    | 16     | allen  | Endothelium                   |
| IO         | 0.87092976 | 0.41079463 | 1.84646682 | 0.71852204 | 24    | 18     | liu    | Endothelium                   |
| IO         | 1.9547557  | 0.70692985 | 5.40516122 | 0.19648771 | 12    | 14     | riaz   | Endothelium                   |

\*pval reported from a logrank statistical test

**Supplementary Table 7.** Pre-trained Clinical Transformer parameters. Column and row headers in bold.

|                            | <b>GENIE</b>                            | <b>Chowell et al.</b>                                  | <b>TCGA</b>                      | <b>Thorsson et al.</b>                                        | <b>Oak trial</b>               |
|----------------------------|-----------------------------------------|--------------------------------------------------------|----------------------------------|---------------------------------------------------------------|--------------------------------|
| <b>Feature types</b>       | <b>Mutations, CNVs and demographics</b> | <b>Aggregated molecular, clinical and demographics</b> | <b>Immune related signatures</b> | <b>Immune signatures, molecular features and demographics</b> | <b>molecular, demographics</b> |
| <b>Epochs</b>              | 20000                                   | 30000                                                  | 20000                            | 20000                                                         | 20000                          |
| <b>learning rate</b>       | 1.00E-04                                | 1.00E-04                                               | 1.00E-04                         | 1.00E-04                                                      | 1.00E-04                       |
| <b>heads</b>               | 8                                       | 2                                                      | 2                                | 2                                                             | 2                              |
| <b>layers</b>              | 8                                       | 2                                                      | 8                                | 8                                                             | 8                              |
| <b>features percentile</b> | 95                                      | 100                                                    | 100                              | 100                                                           | 95                             |
| <b>Embeddings size</b>     | 128                                     | 128                                                    | 128                              | 128                                                           | 128                            |
| <b>Parameters</b>          | 1M                                      | 202k                                                   | 806k                             | 801k                                                          | 800k                           |
| <b>Estimated time</b>      | 100 hours                               | 5 hours                                                | 15 hours                         | 8 hours                                                       | 3 hours                        |
| <b>Accelerator</b>         | Tesla K80 11Gb                          | Tesla K80 11Gb                                         | Tesla K80 11Gb                   | Tesla K80 11Gb                                                | Tesla K80 11Gb                 |
| <b>Batch Size</b>          | 2048                                    | 1479                                                   | 11069                            | 6012                                                          | 321                            |
| <b>Samples</b>             | 134626                                  | 1479                                                   | 11069                            | 6012                                                          | 321                            |
| <b>Features (N)</b>        | 2285                                    | 17                                                     | 29                               | 49                                                            | 414                            |

## Supplementary References

1. Hu, S., Fridgeirsson, E., van Wingen, G. & Welling, M. in Survival Prediction-Algorithms, Challenges and Applications 132-148 (PMLR, 2021).
2. Ching, T., Zhu, X. & Garmire, L.X. Cox-nnet: an artificial neural network method for prognosis prediction of high-throughput omics data. *PLoS computational biology* **14**, e1006076 (2018).
3. Katzman, J.L. et al. DeepSurv: personalized treatment recommender system using a Cox proportional hazards deep neural network. *BMC medical research methodology* **18**, 1-12 (2018).
4. Fotso, S. Deep neural networks for survival analysis based on a multi-task framework. *arXiv preprint arXiv:1801.05512* (2018).
5. Gensheimer, M.F. & Narasimhan, B. A scalable discrete-time survival model for neural networks. *PeerJ* **7**, e6257 (2019).
6. Chowell, D. et al. Improved prediction of immune checkpoint blockade efficacy across multiple cancer types. *Nature Biotechnology* **40**, 499-506 (2022).
7. Thorsson, V. et al. The immune landscape of cancer. *Immunity* **48**, 812-830. e814 (2018).
8. Samstein, R.M. et al. Tumor mutational load predicts survival after immunotherapy across multiple cancer types. *Nature genetics* **51**, 202-206 (2019).
9. Miao, D. et al. Genomic correlates of response to immune checkpoint blockade in microsatellite-stable solid tumors. *Nature genetics* **50**, 1271-1281 (2018).
10. Van Allen, E.M. et al. Genomic correlates of response to CTLA-4 blockade in metastatic melanoma. *Science* **350**, 207-211 (2015).
11. Bagaev, A. et al. Conserved pan-cancer microenvironment subtypes predict response to immunotherapy. *Cancer cell* **39**, 845-865. e847 (2021).
12. Liu, D. et al. Integrative molecular and clinical modeling of clinical outcomes to PD1 blockade in patients with metastatic melanoma. *Nature medicine* **25**, 1916-1927 (2019).
13. Riaz, N. et al. Tumor and microenvironment evolution during immunotherapy with nivolumab. *Cell* **171**, 934-949. e916 (2017).
